# Supplementary material for: Evolutionary Analyses of GRAS Transcription Factors in Angiosperms
Source: Front Plant Sci. 2017 Mar 2;8:273. doi: 10.3389/fpls.2017.00273 (PMC5332381; doi:10.3389/fpls.2017.00273)
Supplement: Supplementary Table 1 — Gene list of the eight studied species according to the OG assignation. For each gene, names in different annotations and nomenclature used in previously published study are provided. [file Table1.XLSX]

## Sheet: Amb-SM
a. Sequence ID	Gene annotation	RefSeq ID
OG-SCR-1	evm_27.model.AmTr_v1.0_scaffold00077.226	LOC18432479
OG-SCR-2	evm_27.model.AmTr_v1.0_scaffold00032.155	LOC18443187
OG-SCR-2	evm_27.model.AmTr_v1.0_scaffold00036.134/135	LOC18443708
OG-SCR-3	evm_27.model.AmTr_v1.0_scaffold04794.1	LOC18425528
OG-SHR-1	evm_27.model.AmTr_v1.0_scaffold00086.29	LOC18430893
OG-SHR-2	evm_27.model.AmTr_v1.0_scaffold00066.229	LOC18448723
OG-DELLA-1	evm_27.model.AmTr_v1.0_scaffold00010.106	LOC18422344
OG-DELLA-1	evm_27.model.AmTr_v1.0_scaffold00012.77/78/79		remnant
OG-DELLA-2	evm_27.model.AmTr_v1.0_scaffold00122.72	LOC18425039
OG-SCL32-1	evm_27.model.AmTr_v1.0_scaffold00137.36	LOC18421842
OG-SCL32-2	evm_27.model.AmTr_v1.0_scaffold00043.33	LOC18440973
OG-HAM-II	evm_27.model.AmTr_v1.0_scaffold00044.249	LOC18445615
OG-HAM-I	evm_27.model.AmTr_v1.0_scaffold00059.65	LOC18445865
OG-LISCL	evm_27.model.AmTr_v1.0_scaffold00012.209	LOC18436160
OG-NSP1	evm_27.model.AmTr_v1.0_scaffold00024.262	LOC18439455
OG-PAT-1	evm_27.model.AmTr_v1.0_scaffold00088.132	LOC18427652
OG-PAT-2	evm_27.model.AmTr_v1.0_scaffold00043.24	LOC18440964
OG-PAT-3	evm_27.model.AmTr_v1.0_scaffold00186.3	LOC18432892
OG-LS	evm_27.model.AmTr_v1.0_scaffold00061.21	LOC18447384
OG-LS	evm_27.model.AmTr_v1.0_scaffold00001.445		remnant
OG-SCL3	evm_27.model.AmTr_v1.0_scaffold00053.77	LOC18433248
OG-DLT	evm_27.model.AmTr_v1.0_scaffold00069.75	LOC18447736
OG-SCL4/7	evm_27.model.AmTr_v1.0_scaffold00059.32	LOC18445829
OG-NSP2-1	evm_27.model.AmTr_v1.0_scaffold00156.32	LOC18995752
OG-NSP2-2	evm_27.model.AmTr_v1.0_scaffold00030.43	LOC18444325
OG-NSP2-3	evm_27.model.AmTr_v1.0_scaffold00153.11	LOC18437110
OG-NSP2-Amb	evm_27.model.AmTr_v1.0_scaffold00007.335	LOC18433705
OG-NSP2-Amb	evm_27.model.AmTr_v1.0_scaffold00007.332	LOC18433702
OG-SCLA	evm_27.model.AmTr_v1.0_scaffold00017.27	LOC18436680
OG-SCLB	evm_27.model.AmTr_v1.0_scaffold00166.23	LOC18438696
OG-SCLB	evm_27.model.AmTr_v1.0_scaffold00166.29	LOC18438702
OG-SCLB	evm_27.model.AmTr_v1.0_scaffold00166.28	LOC18438701
OG-SCLB	evm_27.model.AmTr_v1.0_scaffold00166.25	LOC18438698
OG-SCLB	evm_27.model.AmTr_v1.0_scaffold00045.193	LOC18430217+LOC105420338	remnant
OG-SCLB	evm_27.model.AmTr_v1.0_scaffold00045.194		remnant
OG-SCLB	evm_27.model.AmTr_v1.0_scaffold00045.195		remnant
OG-SCLB	evm_27.model.AmTr_v1.0_scaffold00045.196/197	LOC18430220+LOC18430221 (partial)	remnant
OG-SCLB	evm_27.model.AmTr_v1.0_scaffold00045.198	LOC18430221 (partial)	remnant
OG-RAM1	evm_27.model.AmTr_v1.0_scaffold00016.177/178	LOC18434456
OG-RAM1	evm_27.model.AmTr_v1.0_scaffold00016.179		remnant
OG-SCLD	evm_27.model.AmTr_v1.0_scaffold00004.296	LOC18421496
OG-RAD1-1	evm_27.model.AmTr_v1.0_scaffold00049.33	LOC18441847
						intron
						LOC18430217

## Sheet: Pd-SM
OG	Gene annotation	RefSeq ID
OG-SCR-1	PDK_30s1036321g001	LOC103705904
OG-SCR-1	unannoted	LOC103717883
OG-SCR-2	PDK_30s811301g001	LOC103714426
OG-SCR-2	unannoted	LOC103704547
OG-SCR-3	PDK_30s763521g002	LOC103721747
OG-SHR-1	unannoted	LOC103705312
OG-SHR-1	unannoted	LOC103716950
OG-SHR-2	PDK_30s710451g016	LOC103715985
OG-SHR-2	PDK_30s887211g002	LOC103708579
OG-DELLA-1	PDK_30s992571g001	LOC103701852
OG-DELLA-1	PDK_30s881141g001	LOC103721390
OG-DELLA-2	PDK_30s1180271g006	LOC103721072
OG-DELLA-2	unannoted	LOC103697278
OG-SCL32-1	PDK_30s1063481g001	LOC103695866
OG-SCL32-1	PDK_30s719591g001	LOC103705332
OG-SCL32-2	PDK_30s700381g001	LOC103723876
OG-HAM-II	PDK_30s65509180g001	LOC103712147
OG-HAM-II	PDK_30s907721g005	LOC103705134
OG-HAM-II	unannoted	LOC103712252
OG-HAM-II	unannoted	LOC103710711
OG-HAM-I	unannoted	LOC103711304
OG-HAM-I	unannoted	LOC103697926
OG-LISCL	PDK_30s945381g008	LOC103697097
OG-LISCL	PDK_30s6550972g001	LOC103704163
OG-LISCL	PDK_30s692531g009/PDK_30s895901g001	LOC103703511
OG-LISCL	PDK_30s928761g001	LOC103714321
OG-NSP1	PDK_30s879811g002	LOC103712559
OG-NSP1	PDK_30s918561g019	LOC103716290
OG-PAT-1	PDK_30s771211g001/PDK_30s771211g002	LOC103714936
OG-PAT-1	PDK_30s721891g003	LOC103700863
OG-PAT-2	PDK_30s722381g001	LOC103696316
OG-PAT-2	PDK_30s673181g001	LOC103712632
OG-PAT-3	PDK_30s940251g001	LOC103719135
OG-PAT-4	PDK_30s838401g003	LOC103702695
OG-PAT-4	PDK_30s1184251g001/PDK_30s1193491g001	LOC103719657
OG-LS	PDK_30s769401g007	LOC103718946
OG-LS	PDK_30s868571g006	LOC103722391
OG-LS	unannoted	LOC103713574
OG-LS	PDK_30s772531g003	LOC103702435
OG-SCL3	PDK_30s857351g003/PDK_30s765701g001	LOC103705597
OG-SCL3	PDK_30s939691g004	LOC103696714
OG-SCL3	PDK_30s827291g008	LOC103705075
OG-DLT	PDK_30s1139221g001	LOC103698941
OG-DLT	unannoted	LOC103715078
OG-SCL4/7	PDK_30s65509195g001	LOC103704239
OG-SCL4/7	unannoted	LOC103707594
OG-NSP2-1	PDK_30s728681g001	LOC103701821
OG-NSP2-1	unannoted	LOC103720306
OG-NSP2-2	PDK_30s929832g001	LOC103701373
OG-SCLA	PDK_30s671251g009	LOC103701394
OG-SCLA	PDK_30s925071g016	LOC103703260
OG-SCLB	PDK_30s1092571g001	LOC103720661
OG-SCLB	unannoted	LOC103724038
OG-SCLB	unannoted	LOC103724039
OG-SCLB	unannoted	LOC103724040
OG-SCLB	PDK_30s711191g007	LOC103724041
OG-RAM1	PDK_30s845411g004/DK_30s1114141g001	LOC103708129
OG-RAD1-1	PDK_30s705951g002	LOC103714497
OG-RAD1-2	PDK_30s1188121g002	LOC103711460

## Sheet: Ma-SM
OG	Gene annotation V2	Gene annotation V1	Gene annotation V2
OG-SCR-1	Ma11_g18500	GSMUA_Achr11G20070_001	LOC_103971922
OG-SCR-1	Ma05_g23910	GSMUA_Achr5G21440_001	LOC_103985587
OG-SCR-1	Ma08_g09130	GSMUA_Achr8G09400_001	LOC_103993432
OG-SCR-2	Ma04_g30070	GSMUA_Achr4G23590_001	LOC_103982895
OG-SHR-1	Ma01_g15900	GSMUA_Achr1G22470_001	LOC_103990683
OG-SHR-1	Ma08_g31390	GSMUA_Achr8G30950_001	LOC_103995805
OG-SHR-1	Ma04_g17020	GSMUA_Achr4G16460_001	LOC_103981861
OG-SHR-2	Ma10_g16450	GSMUA_Achr10G16410_001	LOC_103969770
OG-SHR-2	Ma09_g02320	GSMUA_Achr9G02380_001	LOC_103997223
OG-SHR-2	Ma09_g20690	GSMUA_Achr6G21350_001	LOC_103988688
OG-DELLA-1	Ma10_g19630	GSMUA_Achr10G19650_001	LOC_103968703
OG-DELLA-1	Ma02_g24350	GSMUA_Achr2G22510_001	LOC_103976677
OG-DELLA-1	Ma08_g17700	GSMUA_Achr8G18250_001	LOC_103994905
OG-DELLA-1	Ma01_g14650	GSMUA_Achr1G21300_001	LOC_103991803
OG-DELLA-1	Ma09_g13060	GSMUA_Achr9G13490_001	(remnant)
OG-DELLA-2	Ma06_g36470	GSMUA_Achr6G34550_001	LOC_103990128
OG-SCL32-1	Ma10_g11650	GSMUA_Achr10G11390_001	LOC_104000714
OG-SCL32-1	Ma06_g09430	GSMUA_Achr6G07790_001	LOC_103987238
OG-SCL32-1	Ma06_g18350	GSMUA_Achr6G16880_001	LOC_103988017
OG-SCL32-2	Ma06_g25650	GSMUA_Achr6G24300_001	LOC_103988955
OG-HAM-II	Ma06_g38750	GSMUA_Achr6G36740_001	LOC_103989927
OG-HAM-II	Ma04_g25650	GSMUA_Achr1G05940_001	LOC_103998416
OG-HAM-II	Ma07_g06770	unannoted	LOC_103990440
OG-HAM-II	Ma08_g10950	GSMUA_Achr8P11160_001	LOC_103993280
OG-HAM-II	Ma11_g04080	GSMUA_Achr11P04360_001	LOC_103970379
OG-HAM-II	Ma11_g19440	GSMUA_Achr11P21080_001	LOC_103972011
OG-HAM-II	Ma05_g23270	GSMUA_Achr5P20860_001	LOC_103985639
OG-HAM-I	Ma04_g07170	GSMUA_Achr4P07190_001	LOC_103980833
OG-HAM-I	Ma03_g31190	GSMUA_Achr3P29970_001	LOC_103979866
OG-HAM-I	Ma04_g03560	GSMUA_Achr4P03460_001	LOC_103980174
OG-LISCL	Ma10_g02270	GSMUA_Achr10P02440_001	LOC_103999798
OG-LISCL	Ma07_g15010	GSMUA_Achr7P15080_001	LOC_103991708
OG-LISCL	Ma10_g22580	GSMUA_Achr10P22610_001	LOC_103968978
OG-LISCL	Ma00_g04570	GSMUA_AchrUn_randomP21740_001	LOC_103974738
OG-LISCL	Ma08_g02350	GSMUA_Achr8P02550_001	LOC_103994023
OG-LISCL	Ma05_g08020	GSMUA_Achr5P08320_001	LOC_103984249
OG-LISCL	Ma06_g36050	GSMUA_Achr6P34090_001	LOC_103990168
OG-NSP1	Ma10_g17600	GSMUA_Achr10P17570_001	LOC_103968516
OG-PAT-1	Ma04_g07000	GSMUA_Achr4P07010_001	LOC_103980815
OG-PAT-1	Ma04_g11040	GSMUA_Achr4P11050_001	LOC_103981157
OG-PAT-1	Ma01_g22010	GSMUA_AchrUn_randomP18920_001	LOC_103974444
OG-PAT-2	Ma06_g25670	GSMUA_Achr6P24310_001	LOC_103988957
OG-PAT-2	Ma09_g11650	GSMUA_Achr9P12070_001	LOC_103997682
OG-PAT-2	Ma09_g25150	GSMUA_Achr9P24710_001	LOC_103998880
OG-PAT-2	Ma08_g03530	GSMUA_Achr8P03610_001/GSMUA_Achr8P03620_001	LOC_103993934
OG-PAT-3	Ma06_g13300	GSMUA_Achr6P11790_001/GSMUA_Achr6P11780_001	LOC_103987582
OG-PAT-3	Ma10_g17350	GSMUA_Achr10P17290_001	LOC_103968496
OG-PAT-3	Ma03_g02280	GSMUA_Achr3P02410_001	LOC_103977121
OG-PAT-4	Ma05_g12570	GSMUA_Achr5P12810_001	LOC_103984444
OG-PAT-4	Ma04_g32970	GSMUA_Achr4P26400_001	LOC_103982658
OG-PAT-4	Ma05_g16130	GSMUA_AchrUn_randomP04680_001	LOC_103973160
OG-PAT-4	Ma11_g02690	GSMUA_Achr11P02800_001	LOC_103970260
OG-PAT-4	Ma04_g23420	GSMUA_Achr1P03650_001	LOC_103976360
OG-PAT-4	Ma09_g19630	GSMUA_Achr9P18770_001	LOC_103998354
OG-PAT-4	Ma04_g31520	GSMUA_Achr4P24960_001	LOC_103982770
OG-PAT-4		chr3 (28725884..28725518) (remnant)
OG-LS	Ma01_g00100	GSMUA_Achr1P09360_001	LOC_103981071
OG-LS	Ma07_g16700	GSMUA_Achr7P16880_001	LOC_103992032
OG-LS	Ma01_g12700	GSMUA_Achr1P19470_001	LOC_103993532
OG-LS	Ma03_g11670	GSMUA_AchrUn_randomP25630_001	LOC_103975203
OG-SCL3	Ma11_g05610	GSMUA_Achr11P05840_001	LOC_103970501
OG-SCL3	Ma08_g09470	GSMUA_Achr8P09690_001	LOC_103993408
OG-SCL3	Ma11_g18690	GSMUA_Achr11P20260_001	LOC_103971943
OG-DLT	Ma04_g26390	GSMUA_Achr4P19750_001	LOC_103983239
OG-DLT	Ma07_g05950	GSMUA_Achr7P05850_001	LOC_103990516
OG-DLT	Ma01_g12080	GSMUA_Achr1P18840_001	LOC_103994026
OG-DLT	Ma01_g09550	GSMUA_Achr1P16230_001 (pseudogene)	LOC_103989254
OG-SCL4/7	Ma04_g07320	GSMUA_Achr4P07320_001	LOC_103980847
OG-SCL4/7	Ma03_g31740	GSMUA_Achr3P30530_001	LOC_103979814
OG-SCL4/7	Ma07_g28380	GSMUA_AchrUn_randomP22160_001	LOC_103974764
OG-NSP2-1	Ma08_g16560	GSMUA_Achr1P26740_001	LOC_103999207
OG-SCLA	Ma10_g10710	GSMUA_Achr10P09690_001	LOC_104000288
OG-SCLA	Ma06_g19260	GSMUA_Achr6P17870_001	LOC_103988092
OG-RAM1	Ma06_g22250	GSMUA_Achr6P20830_001	LOC_103988649
OG-RAD1-1	Ma08_g01100	GSMUA_Achr8P01180_001	LOC_103994399

## Sheet: Os-SM
OG	Gene name		Tian et al. 2004
OG-SCR-1	Os11g03110	Os11g0124300	OsGRAS-41
OG-SCR-1	Os12g02870	Os12g0122000	OsGRAS-51
OG-SCR-2	Os07g38030	Os07g0567700	OsGRAS-35
OG-SCR-3	Os05g40710	Os05g0485400	OsGRAS-28
OG-SCR-3	Os08g34040			remnant
OG-SHR-1	Os07g39820	Os07g0586900	OsGRAS-38
OG-SHR-1	Os03g31880	Os03g0433200	OsGRAS-15
OG-DELLA-1	Os03g49990	Os03g0707600	OsGAI/SLR1
OG-DELLA-2	Os05g49930	Os05g0574900	OsGRAS-30
OG-DELLA-2	Os01g45860	Os01g0646300	OsGRAS-1
OG-SCL32-1	Os07g40020	Os07g0589200	OsGRAS-37
OG-SCL32-2	Os05g42130	Os05g0500600	OsGRAS-29
OG-HAM-II	Os02g44360	Os02g0662700	OsGRAS-8
OG-HAM-II	Os02g44370	Os02g0663100	OsGRAS-9
OG-HAM-II	Os04g46860	Os04g0555000	OsGRAS-21
OG-HAM-II	Os06g01620	Os06g0105350	OsGRAS-31
OG-HAM-II	Os10g40390	Os10g0551200	OsGRAS-40
OG-LISCL	Os01g62460	Os01g0842200	OsGRAS-2
OG-LISCL	Os03g48450	Os03g0690600	OsGRAS-17
OG-LISCL	Os04g50060	Os04g0590400	OsGRAS-23
OG-LISCL	Os11g04400	Os11g0139600	OsGRAS-42
OG-LISCL	Os11g47870	Os11g0705200	OsGRAS-46
OG-LISCL	Os11g47890		OsGRAS-47
OG-LISCL	Os11g47900	Os11g0705900	OsGRAS-48
OG-LISCL	Os11g47910	Os11g0706000	OsGRAS-49
OG-LISCL	Os11g47920	Os11g0706200	OsGRAS-50
OG-LISCL	Os12g04200	Os12g0136300 (rc)	OsGRAS-52
OG-LISCL	Os12g38490	Os12g0573200	OsGRAS-56
OG-LISCL	unannoted_Os05g01970(rc)	Os05g0110400a	OsGRAS-24
OG-LISCL	unannoted2_Os05g01970(rc)	Os05g0110400b	OsGRAS-25
	Os03g40080			remnant
	Os11g11600			remnant
OG-NSP1	Os03g29480	Os03g0408600	OsGRAS-14
	Os08g36230			remnant
OG-PAT-1	Os03g09280	Os03g0193000	OsGRAS-12
OG-PAT-1	Os07g39470	Os07g0583600	CIGR2
OG-PAT-1	Os10g22430	Os10g0369600	OsGRAS-39
OG-PAT-2	Os07g36170	Os07g0545800	CIGR1
OG-PAT-3	Os01g65900	Os01g0881500	OsGRAS-3
OG-PAT-4	Os02g45760	Os02g0681900	OsGRAS-10
OG-PAT-4	Os04g49110	Os04g0580300	OsGRAS-22
OG-PAT-4	Os02g21685			remnant
OG-LS	Os02g10360	Os02g0197300	OsGRAS-7
OG-LS	Os06g40780	Os06g0610350	MOC1
OG-LS	Os12g05060			remnant
OG-SCL3	Os01g71970	Os01g0948200	OsGRAS-6
OG-SCL3	Os05g31380	Os05g0378200	OsGRAS-26
OG-SCL3	Os05g31420	Os05g0378500	OsGRAS-27
OG-SCL3	Os12g04370 (C-terminal)	OS12G0138100	OsGRAS-53
OG-SCL3	Os12g04370 (N-terminal)	OS12G0138166	OsGRAS-53
OG-SCL3	Os12g04380	OS12G0138200	OsGRAS-54
OG-SCL3	Os11g04570 (C-terminal)	OS11G0141500	OsGRAS-43
OG-SCL3	Os11g04570 (N-terminal)	Os11g0141550	OsGRAS-43
OG-SCL3	Os11g04590	OS11G0141700	OsGRAS-44
OG-SCL3	Os06g10900			remnant
OG-SCL3	Os05g31360			remnant
OG-SCL3	Os05g31370			remnant
OG-SCL3	Os05g31390			remnant
OG-DLT	Os06g03710	Os06g0127800	OsGRAS-32
OG-DLT	Os07g16330			remnant
OG-DLT	Os05g40130			remnant
OG-DLT	Os03g37900			remnant
OG-DLT	Os04g37440			remnant
OG-SCL4/7	Os03g51330	Os03g0723000	OsGRAS-19
OG-NSP2-1	Os03g15680	Os03g0263350	OsGRAS-13
OG-NSP2-2	Os11g06180	Os11g0160550	OsGRAS-45
OG-NSP2-2	Os12g06540	Os12g0162700	OsGRAS-55
OG-SCLA	Os04g35250	Os04g0432100	OsGRAS-20
OG-RAM1	Os11g31100	Os11g0507300
OG-RAD1-1	Os01g67650	unannoted	OsGRAS-4
OG-RAD1-1	Os01g67670			remnant
												0.739884

## Sheet: Cc-SM
OG	Gene annotation
OG-SCR-1	Cc05_g00010
OG-SCR-2	Cc05_g00060
OG-SCR-2	Cc01_g04900	remnant
OG-SCR-2	Cc06_g22660	remnant
OG-SCR-3	Cc01_g18150
OG-SHR-1	Cc07_g07090
OG-SHR-2	Cc03_g12280
OG-DELLA-1	Cc11_g08290
OG-DELLA-1	Cc07_g13590
OG-DELLA-1	Cc11_g09000	remnant
OG-DELLA-1	unannoted remnant (Cc04:5779409..5779723)	remnant
OG-DELLA-1	Cc08_g06670	remnant
OG-DELLA-1	Cc05_g02220	remnant
OG-DELLA-1	Cc01_g03640	remnant
OG-DELLA-2	Cc06_g09110(modif)
OG-SCL32-1	Cc07_g06890
OG-SCL32-2	Cc07_g10300
OG-SCL32-2	Cc05_g05360
OG-HAM-II	Cc02_g24390
OG-HAM-II	Cc08_g12670
OG-HAM-I	Cc07_g09180
OG-LISCL	Cc01_g04280-1
OG-LISCL	Cc01_g04280-2
OG-LISCL	Cc01_g04290
OG-LISCL	Cc01_g13060
OG-LISCL	Cc01_g13070
OG-LISCL	Cc01_g06640
OG-LISCL	Cc01_g06650
OG-LISCL	Cc01_g04300
OG-LISCL	Cc01_g04310
OG-LISCL	Cc02_g07650
OG-LISCL	Cc06_g22670
OG-NSP1	Cc04_g01330
OG-PAT-1	Cc00_g06820
OG-PAT-1	Cc09_g00640
OG-PAT-2	Cc05_g13080
OG-PAT-3	Cc10_g13150
OG-PAT-4	Cc02_g02540
OG-LS	Cc05_g15850
OG-SCL3	Cc01_g05900
OG-SCL3	Cc02_g29570
OG-DLT	Cc08_g14050
OG-SCL4/7	Cc07_g09460
OG-NSP2-1	Unannoted (chr10:complement(16164152..16165708))
OG-NSP2-2	Cc07_g17440
OG-NSP2-2	Cc07_g16860	remnant
OG-NSP2-3	Cc06_g00940
OG-NSP2-3	Cc06_g00950
OG-SCLA	Cc08_g06100
OG-SCLA	Cc00_g08580
OG-SCLB	Unannoted Cc03(712804..714285)
OG-SCLB	Cc01_g07010
OG-SCLB	Cc08_g04760
OG-SCLB	Cc03_g00940
OG-SCLB	Cc03_g00950
OG-SCLB	Cc03_g03300	remnant ?
OG-SCLB	Cc10_g15260	remnant ?
OG-RAM1	Cc07_g01010
OG-RAD1-1	Cc11_g16400
OG-RAD1-1	Unannoted (chr04:complement(9518739..9520325))

## Sheet: Vv-SM
OG	RefSeq ID	Genoscope annotation	Sun et al. 2015	Grimplet et al.2013 annotation	Grimplet et al. 2016
OG-SCR-1	LOC100265598	VIT_00029824001	GRAS37	Vitvi08g00007	SCR1
OG-SCR-2	LOC100854772	unannoted		Vitvi03g01226	SCR2
OG-SCR-3	LOC100263529	unannoted		Vitvi07g00627	SCR3
OG-SHR-1	LOC100263197	VIT_00000107001	GRAS34	Vitvi07g02073	SHR1
OG-SHR-2	LOC100264604/LOC100854487	VIT_00004104001	GRAS42	Vitvi05g01554	SHR2
OG-DELLA-1	LOC100232937	VIT_00011710001	GRAS02	Vitvi01g00446	RGA5
OG-DELLA-1	LOC100253268	VIT_00030735001	GRAS10	Vitvi14g00841	RGA4
OG-DELLA-2	LOC100249084	VIT_00015465001		Vitvi11g00409	RGA3
OG-SCL32-1	LOC100252691	VIT_00000142001	GRAS35	Vitvi07g01612	SHR5
OG-SCL32-2	LOC100248290	VIT_00030652001	GRAS04	Vitvi12g00571	SHR4
OG-HAM-II	LOC100252271	VIT_00001308001	GRAS20	Vitvi02g00536	HAM1
OG-HAM-II	LOC100267664	VIT_00027680001	GRAS12	Vitvi15g00680	HAM2
OG-HAM-I	LOC100251313	VIT_00019006001	GRAS25	Vitvi04g01247	HAM3
OG-LISCL	LOC100245086	VIT_00024931001	GRAS29	Vitvi06g00492	LISCL2
OG-LISCL	LOC100267399	VIT_00024932001	GRAS30	Vitvi06g00491	LISCL1
OG-LISCL	LOC100257123	VIT_00024933001	GRAS31	Vitvi06g00490	LISCL4
OG-LISCL	LOC100262198	VIT_00024935001	GRAS32	Vitvi06g00489	LISCL3
OG-LISCL	LOC100251782	VIT_00024935001		Vitvi06g01569	LISCL12
OG-LISCL	LOC100241120	VIT_00016520001	GRAS06	Vitvi13g00310	LISCL8
OG-LISCL	LOC100263396	VIT_00016521001	GRAS07	Vitvi13g00311	LISCL10
OG-LISCL	LOC100252951	VIT_00016522001		Vitvi13g00312	LISCL7
OG-LISCL	LOC100242700	VIT_00016522001	GRAS08	Vitvi13g00313	LISCL6
OG-LISCL	LOC100264982	VIT_00016523001	GRAS09	Vitvi13g00314	LISCL9
OG-LISCL	LOC100252795	VIT_00034155001	GRAS40	Vitvi08g01214	LISCL5
OG-LISCL	LOC100258258	unannoted		Vitvi13g01864	LISCL11
OG-NSP1	LOC100261706	VIT_00016753001	GRAS41	Vitvi09g01487	SHR3
OG-PAT-1	LOC100245041	VIT_00007007001	GRAS43	Vitvi10g00271	PAT3
OG-PAT-1	LOC100250258	VIT_00037777001	GRAS19	Vitvi19g00619	PAT2
OG-PAT-1	LOC100261403	VIT_00030047001	GRAS03	Vitvi12g00665	PAT1
OG-PAT-2	LOC100267541	VIT_00014570001	GRAS17	Vitvi19g00392	PAT4
OG-PAT-2	remnant	VIT_00022613001
OG-PAT-3	LOC100253954	VIT_00010007001	GRAS15	Vitvi18g01210	PAT8
OG-PAT-3	LOC100854518	VIT_00026482001	GRAS26	Vitvi04g01696	PAT7
OG-PAT-4	LOC100261057	unannoted		Vitvi16g01086	PAT6
OG-LS	LOC100261722	VIT_00014862001	GRAS18	Vitvi19g00932	LAS1
OG-SCL3	LOC100258442	VIT_00000847001	GRAS05	Vitvi13g01556	SCL3c
OG-SCL3	LOC100253019	VIT_00037375001	GRAS33	Vitvi06g01133	SCL3a
OG-SCL3	LOC100263490	unannoted		Vitvi14g01348	SCL3d
OG-SCL3	remnant	VIT_00019810001	GRAS22	Vitvi02g00974	SCL3b
OG-DLT	LOC100247949	VIT_00019809001	GRAS21	Vitvi02g00370	GRAS8a
OG-SCL4/7	LOC100246179	VIT_00018975001	GRAS24	Vitvi04g01281	LAS2
OG-NSP2-1	LOC100250491	VIT_00008901001	GRAS14	Vitvi18g00300	SCL26b
OG-NSP2-2	LOC100248787	VIT_00026574001	GRAS27	Vitvi04g01622	SCL26a
OG-NSP2-3	LOC104880018	VIT_00030305001	GRAS38	Vitvi08g01969	GRASV3c
OG-NSP2-3	LOC104877372	VIT_00030308001	GRAS39	Vitvi08g00746	GRASV3b
OG-NSP2-3	LOC100854695	unannoted		Vitvi08g00751	GRASV3a
OG-SCLA	LOC100242818	VIT_00034878001	GRAS16	Vitvi18g01322	GRAS8b
OG-SCLB	LOC100250283	VIT_00028126001	GRAS36
OG-SCLB	remnant	VIT_00035009001	GRAS28
OG-RAM1	LOC100263422	VIT_00033046001	GRAS11	Vitvi17g01040	GRASV1c
OG-RAD1-1	LOC100263271	VIT_00007532001	GRAS13	Vitvi17g01040	GRASV1d
OG-RAD1-1	LOC100256348	VIT_00010305001	GRAS01	Vitvi01g01509	GRASV1b
OG-RAD1-2	LOC100262121	unannoted		Vitvi19g01706	GRASV1a

## Sheet: Tc-SM
OG	Argout et al. 2010 (Criollo annotation)	Motamayor et al. 2013 (Matina 1-6 annotation)
OG-SCR-1	Tc00_g017070	TCM_017746
OG-SCR-2	Tc01_g017050	TCM_002021
OG-SCR-3	Tc01_g025440	TCM_003984
OG-SHR-1	Tc01_g006550	TCM_000801
OG-SHR-2	Tc04_g019740	TCM_019978
OG-DELLA-1	Tc02_g028520	TCM_010965
OG-DELLA-1	Tc00_g085970	TCM_019165
OG-DELLA-1	Tc04_g014470	TCM_019414	remnant?
OG-DELLA-1	Tc04_g019860	TCM_019956	remnant?
OG-DELLA-2	Tc09_g010580	TCM_037975
OG-SCL32-1	Tc01_g006290	TCM_000764
OG-SCL32-2	Tc02_g014350	TCM_007806
OG-HAM-II	Tc01_g038130	TCM_005571
OG-HAM-II	Tc03_g025170	TCM_015991
OG-HAM-I	Tc01_g003560	TCM_000435
OG-LISCL	Tc05_g004430	TCM_021920
OG-LISCL	Tc09_g031470	TCM_041810
OG-LISCL	Tc09_g031480	TCM_041812
OG-LISCL	Tc09_g031490	TCM_041813
OG-LISCL	Tc09_g031500	TCM_041814
OG-LISCL	Tc09_g031510	TCM_041815
OG-LISCL	Tc10_g002720	TCM_042705
OG-NSP1	Tc00_g013310	TCM_029136
OG-PAT-1	Tc01_g018470	TCM_002319
OG-PAT-1	Tc06_g020560	TCM_030393
OG-PAT-1	Tc07_g002000	TCM_030733
OG-PAT-2	Tc07_g005270	TCM_031132
OG-PAT-3	Tc08_g012470	TCM_035362
OG-PAT-4	Tc03_g020070	TCM_015228
OG-LS	Tc00_g007680	TCM_030498
OG-SCL3	Tc09_g023730	TCM_040833
OG-SCL3	Tc10_g000490	TCM_042392
OG-SCL3	Tc00_g011740	TCM_018964
OG-DLT	Tc03_g026770	TCM_016186
OG-SCL4/7	Tc01_g003290	TCM_000399
OG-NSP2-1	Tc08_g010330	TCM_035069
OG-NSP2-3	Tc05_g001850	TCM_021618
OG-NSP2-3	Tc09_g034350	TCM_042194
OG-SCLA	Tc08_g016010	TCM_036707
OG-SCLB	Tc01_g031760	TCM_004818
OG-SCLB	Tc04_g029380	TCM_021350
OG-SCLB	Tc04_g029390	TCM_021351
OG-RAM1	Tc04_g004010	TCM_017269
OG-RAD1-1	Tc02_g026050	TCM_010708
OG-RAD1-1	Tc03_g014290	TCM_014574
OG-RAD1-2	Tc00_g064930	TCM_033446

## Sheet: At-SM
OG	Protein ID	Tian et al. 2004	Pysh et al. 1999; Lee et al. 2008
OG-SCR-1	AT3G54220.1	SCR	SCR
OG-SCR-2	AT5G41920.1	AtGRAS-28	SCL23
OG-SHR-1	AT4G37650.1	SHR	SHR
OG-DELLA-1	AT1G14920.1	GAI	GAI
OG-DELLA-1	AT1G66350.1	RGL1	RGL1
OG-DELLA-1	AT2G01570.1	RGA	RGA
OG-DELLA-1	AT3G03450.1	RGL2	RGL2
OG-DELLA-1	AT5G17490.1	RGL3	RGL3
OG-SCL32-1	AT3G49950.1	AtGRAS-18	SCL32
OG-SCL32-1	AT5G67411.1 (pseudo)
OG-HAM-II	AT2G45160.1	AtGRAS-14	SCL27
OG-HAM-II	AT3G60630.1	AtGRAS-21	SCL22
OG-HAM-II	AT4G00150.1	AtGRAS-22	SCL6
OG-HAM-I	AT4G36710.1	AtGRAS-25	SCL15
OG-LISCL	AT1G07520.1	AtGRAS-1	SCL31
OG-LISCL	AT1G07530.1	AtGRAS-2	SCL14
OG-LISCL	AT2G29060.1	AtGRAS-12	SCL33
OG-LISCL	AT2G29065.1
OG-LISCL	AT2G37650.1	AtGRAS-13	SCL9
OG-LISCL	AT3G46600.1	AtGRAS-17	SCL30
OG-LISCL	AT5G59450.1	AtGRAS-31	SCL11
OG-NSP1	AT3G13840.1	AtGRAS-16	SCL29
OG-PAT-1	AT4G17230.1	AtGRAS-24	SCL13
OG-PAT-1	AT2G04890.1	AtGRAS-11	SCL21
OG-PAT-1	AT5G48150.1	PAT1	PAT1
OG-PAT-1	AT1G50600.1	AtGRAS-6	SCL5
OG-PAT-3	AT1G21450.1	AtGRAS-4	SCL1
OG-PAT-4	AT5G52510.1	AtGRAS-30	SCL8
OG-LS	AT1G55580.1	LAS	SCL18
OG-SCL3	AT1G50420.1	AtGRAS-5	SCL3
OG-DLT	AT1G63100.1	AtGRAS-8	SCL28
OG-SCL4/7	AT3G50650.1	AtGRAS-19	SCL7
OG-SCL4/7	AT5G66770.1	AtGRAS-32	SCL4
OG-NSP2-1	AT4G08250.1	AtGRAS-23	SCL26
